# Supplementary material
Source: PubMed Central journal article supplement (PMC2117295)
Supplement: thorax_thx.2006.068353_1.pdf [file thorax_thx.2006.068353_1.pdf]

January 18, 2007

MARKED COPY

2006/068353 REVISION 3

**An MMP-9/-12 Inhibitor Prevents Smoke-induced  
Emphysema and Airway Remodeling in Guinea Pigs**

Andrew Churg<sup>1</sup>, Rona Wang<sup>1</sup>, Xiaoshan Wang<sup>1</sup>, Per-Ola Onnervik<sup>2</sup>,  
Kerstin Thim<sup>2</sup>, and Joanne L Wright<sup>1</sup>

<sup>1</sup>Department of Pathology, University of British Columbia, Vancouver, BC Canada

<sup>2</sup> AstraZeneca R&D, Lund, Sweden

Address for correspondence: Andrew Churg, MD, Department of Pathology, University of British Columbia, 2211 Wesbrook Mall, Vancouver, BC, Canada V6T 2B5 Phone 604 822-7775; Fax 604 822-7635; E-mail: achurg@interchange.ubc.ca

Running head: MMPs and Emphysema in Guinea Pigs

Word count=4571

Keywords: Cigarette smoke, COPD, Airway remodeling, MMP-9, MMP-12, TNF $\alpha$

## **Abstract**

*Background:* Matrix metalloproteases (MMPs) are believed to be important in the pathogenesis of cigarette smoke-induced emphysema, but this hypothesis has only been proven in the mouse and its applicability to other species, particularly humans, is uncertain. The role of MMPs in smoke-induced small airway remodeling is unknown.

*Methods:* We examined the effects of a dual MMP-9/MMP-12 inhibitor, AZ11557272, on the development of anatomic and functional changes of COPD in guinea pigs exposed daily to cigarette smoke for up to 6 months.

*Results:* At all times, smoke-induced increases in lavage inflammatory cells, lavage desmosine (a marker of elastin breakdown) and serum TNF $\alpha$  were completely abolished by AZ11557272. At 6 months there was an increase in lung volumes and airspace size. AZ11557272 returned the pressure- volume curve to control levels, decreased smoke-induced increases in TLC, RV, and VC by about 70%, and also reversed smoke-induced airspace enlargement by about 70%. There was a very strong correlation between surface to volume ratio and both lavage desmosine and serum TNF $\alpha$  levels. AZ11557272 protected against smoke-mediated increases in small airway wall thickness, but did not prevent smoke-induced increases in mean pulmonary artery pressure.

*Conclusions:* An MMP-9/MMP-12 inhibitor can substantially ameliorate morphologic emphysema, small airway remodeling, and the functional consequences of these lesions in a non-murine species. These findings strengthen the idea that MMPs are important mediators of the anatomic changes behind COPD in humans, and suggest that MMP-9 and MMP-12 may be potential intervention targets.

## Introduction

The pathogenesis of cigarette smoke-induced emphysema is an area of intense investigation and some confusion. Modern theories of the mechanisms behind emphysema originate from the reports of Gross and colleagues that instillation of proteolytic enzymes into the lungs of experimental animals produced emphysema, [1] and the clinical observation that patients deficient in the serine elastase inhibitor,  $\alpha$ -1-antitrypsin, developed early onset emphysema, particularly if they smoked. [2] These findings lead to the protease-antiprotease hypothesis which states that cigarette smoke causes an influx of inflammatory cells into the lung and that these cells release proteases that overwhelm the local antiproteolytic defenses, leading to matrix destruction and emphysema.

The protease-antiprotease hypothesis is generally accepted, but the exact cells and proteases that are the crucial mediators of matrix destruction remain to be determined. Recent data from mouse models suggest that neutrophils, neutrophil derived serine proteases, and matrix metalloproteases are all involved. Neutrophil elastase knockout mice are about 60% protected against increases in airspace size, [3] whereas MMP-12 (macrophage metalloelastase) knockout mice are 100% protected. [3][4] We have suggested that neutrophil recruitment is linked to MMP-12 by a mechanism in which MMP-12 causes release of active  $\text{TNF}\alpha$ , and  $\text{TNF}\alpha$  subsequently elicits a neutrophil influx into the lung, with matrix destruction mediated by neutrophil-derived proteases, primarily neutrophil elastase.[5]

Although there is a widespread belief that metalloproteases also play a role in the pathogenesis of emphysema in humans (see Discussion), virtually all published data come from mouse models, and the role of metalloproteases in this context in other species are unknown.

This is an important issue because differences in the types of metalloproteases found in different species as well as differing roles for cognate metalloproteases across species (see Discussion) might render observations in mice of little relevance to humans.

Small airway remodeling is a separate but equally important cause of airflow obstruction in humans exposed to cigarette smoke. Very little is known about the pathogenesis of small airway remodeling; the usual assumption is that it is secondary to smoke-induced inflammation, although there is no proof of this idea [6] (and see Discussion).

To evaluate a potential role for metalloproteases in the development of COPD in a non-murine species, and to determine what specific metalloproteases might be involved, we examined the effects of AZ11557272, a dual MMP-9/MMP-12 inhibitor with high selectivity over other MMPs, in guinea pigs exposed to smoke for up to 6 months.

## **Materials and Methods**

*Smoke exposure and treatment with AZ11557272:* Groups of 6-10 female Hartley strain guinea (Charles River, Montreal, Quebec) pigs weighing approximately 350 grams were exposed to the smoke or air (control) of 7 University of Kentucky 2R1 cigarettes 5 days per week for up to 6 months. The smoking apparatus and details of the exposure methods have been described previously by us.[7] Additional groups were treated with AZ11557272 by gavage 1 hour before smoke at a dose of 100mg/kg. AZ11557272 is an orally bioavailable low molecular weight non-hydroxamate MMP-9/MMP-12 inhibitor developed by AstraZeneca. It has minimal action against other MMPs: greater than 3 orders of magnitude selectivity for MMP-9 and -12 over TACE and MMP-1, approximately 2-3 orders of magnitude selectivity over most other MMPs

including MMP-14, and slightly less than 1 order of magnitude selectivity over MMP-8. The dose of 100mg/kg was selected on the basis of range finding experiments to determine a dose that completely suppressed smoke-induced increases in lavage neutrophils 24 hours after a single smoke exposure (see Results and figures in on-line supplement). Using the regimen described above, measured blood levels of AZ11557272 were 50 times the  $IC_{50}$  for MMP-12 and 60 times for MMP-9 at 24 hours after dosing (see Results and Discussion). The exact numbers of animals analyzed at 1 month are 6 control, 10 smoke-exposed, and 10 exposed to AZ11557272; at 3 months 8, 8, and 10, and at 6 months 6, 10, and 8 respectively. All procedures were approved by the University of British Columbia Animal Care Committee.

*Collection of lavage fluid and lung tissue:* At 1, 3, and 6 months of smoking, animals were sacrificed by urethane anaesthesia overdose followed by exsanguination. Blood was collected for serum TNF $\alpha$  measurements. The left lower lobe was lavaged 5 times with 2.5 ml of saline, the cells collected by centrifugation, and cell counts and differential performed. For the 6 month exposure animals, the lavaged lobe was then inflated with agarose at a pressure of 25 cms H<sub>2</sub>O, fixed in formalin for 24 hours, and embedded and sectioned for histologic examination. The left upper lobe was snap frozen and used for whole lung Western blots for metalloprotease levels. The right lower lobe was lavaged with cold distilled water and the lavageate used for desmosine analysis.

*Pulmonary and cardiac function tests:* These were performed at 6 months before animal sacrifice using methods described by us. [7][8]

*Morphometric analysis: Airspace size:* Morphometric analysis followed the approach of Thurlbeck. [9] The lung lobes were sectioned serially in a sagittal fashion. Using a random

selection process, slices were selected and submitted for paraffin embedding and sectioning at five microns thickness, followed by hematoxylin and eosin staining. Using a random selection process 15 fields were photographed at 10 power magnification. Using the ImagePro<sup>(TM)</sup> system with a grid of 130 lines and 250 points with a line length of 2730 microns, numbers of intercepts were counted, and mean airspace size ( $L_m$ ) and surface to volume ratio ( $S_v$ ) were calculated

*Morphometric analysis: Small airway wall thickness:* Five animals from each group were examined. We analyzed all membranous bronchioles regardless of orientation. To measure wall thickness, a line was cast across the largest diameter perpendicular to the longitudinal axis of the airway. External bronchiolar diameter (EB) was measured as the distance between adventitial borders, while internal bronchiolar diameter (IB) was measured as the distance between basement membranes. Wall thickness was calculated as the difference between EB and IB.

*Lavage desmosine analysis:* Desmosine, a marker of elastin breakdown, was measured by HPLC as described by us.[10]

*Serum TNF $\alpha$  levels:* Serum TNF $\alpha$  was measured using the L929 cell assay as described.[5]

*Western blots for whole lung metalloprotease levels:* These were performed using methods described by us. [11] The catalytic domain of guinea pig MMP12 was cloned at AstraZeneca (Lund) by PCR using first strand cDNA from guinea pig lung (Genelink Cat no 10-2107-05) and primers: 5'cattcatatgcctcgatgtggagtgccgat and 5'attgcggccgcctaaatttcgtaagcagcttgaat, containing restriction sites for NdeI and NotI. A pT7 based expression vector was used and insoluble protein was expressed in E.Coli. Active protein was obtained by protein refolding and was used to generate a polyclonal rabbit antibody.

For detection of MMP-12, the membranes were incubated in 1:3000 anti-guinea pig

MMP-12. For detection of MMP-1,-2, and -9, antibodies were purchased from Lab Vision Corporation, (Fremont, CA) and used at 1:1000 (anti MMP-9), 1:300 (anti MMP-1), and 1:500 (anti MMP-2). The second antibody was horseradish peroxidase-conjugated goat anti-rabbit IgG from Santa Cruz. Detection was by chemiluminescence and densitometry was performed on the films.

*Statistical analysis:* Differences among treatment groups were analyzed by analysis of variance with For the pressure-volume curves, repeated measures ANOVA was used. Using the entire set of animals as one group, Pearson correlations were performed between measures of airspace size or surface to volume ratio and lavage cell counts, desmosine, and serum TNF $\alpha$  and type corrections for multiple comparisons were applied as appropriate.

For analysis of airway remodeling, we constructed probability plots for internal bronchial diameter and wall thickness within each animal, and found that the data was normally distributed, thus allowing us to utilize mean animal values. Comparisons of the internal bronchiolar diameters of the three treatment groups were not significantly different, indicating that we had sampled equivalently sized airways in all groups. Using analysis of variance, we then tested for differences in airway wall thickness between groups using individual animal values.

## **Results**

Graphs showing the dose range finding data at 24 hours after a single smoke exposure are presented in the on-line supplement ([Supplement figures 1-3](#)). AZ11557272 suppressed macrophage influx and serum TNF $\alpha$  at levels at low as 3mg/kg, a dose that produces a blood

level about 10 times the  $IC_{50}$  at 24 hours after exposure, but suppression of neutrophil influx required a dose of 30mg/kg. Because, in acute experiments, lavage neutrophil numbers correlate with lavage desmosine, a measure of elastin breakdown [12], we selected a dose of 100mg/kg to ensure complete neutrophil suppression in the chronic exposure model (see Discussion).

Figure 1 shows lavage neutrophil and macrophage counts at 1 and 6 months. Smoke exposure produced marked (4 to 10 fold) increases in lavage neutrophils and roughly doubled lavage macrophage numbers at all time periods (3 month time period not shown); AZ11557272 completely abolished these increases.

Figure 2 shows lavage desmosine and serum  $TNF\alpha$  levels. Desmosine levels were increased 2 to 3 times in the smokers, and this increase was completely prevented by treatment with AZ11557272 at all time periods (3 month time period not shown). Smoke caused a 2 to 2.5 fold increase in serum  $TNF\alpha$  and this increase was abolished by treatment with AZ11557272 (3 month time period not shown).

Figure 3 shows whole lung Western blots against MMP-9 and -12. Levels of MMP-9 were increased about 75% at all time periods; for MMP-12 there was a much more marked increase (more than 2 fold) at 1 month and smaller increases at 3 and 6 months. Treatment with AZ11557272 reduced the smoke-mediated increase in both MMPs. Western blots for MMP-1 and MMP-2 showed only small and mostly nonsignificant changes, but with a general trend toward increased levels in the smokers and decreased levels in animals treated with AZ11557272 (data not shown). Because these are whole lung samples, the increases in specific anatomic compartments such as macrophages may be considerably greater.

Figure 4 shows the pressure-volume curves for the 6 month smoke-exposed animals. At



all distending pressures, lung volumes were significantly greater in the smoke-exposed animals compared to the controls. The pressure-volume curves from animals treated with AZ11557272 were not significantly different from the controls. **Pulmonary function measurements are shown in Supplement figure 4.** TLC, VC, and RV were all increased to a small but significant amount in the smoke-exposed animals and AZ11557272 provided about 70% protection. FRC was also increased in the smokers and decreased by AZ11557272 but the differences were not statistically significant. No differences were seen for ERV.

**Pulmonary artery pressures are shown in Supplement Figure 5.** Mean Ppa was increased about 25% in the smokers. AZ11557272 had no protective effect on Ppa.

**Figure 5** shows representative illustrations of airspace size in the control, smoke-exposed, and AZ11557272 treated animals at 6 months. The protective effect of AZ11557272 is evident on visual inspection. The graphs in Figure 8 show that mean airspace size (Lm) was increased by 62% in the smokers and only 20% in the AZ11557272 treated animals; ie, there was 68% protection against emphysema. Similarly, the surface to volume ratio (Sv) was decreased by 40% in the smokers and only 17% in the AZ11557272 treated animals, indicating 57% protection.

**Figure 6** shows representative images of small airways (membranous bronchioles) from the 3 treatment groups, and a graphical representation of mean airway wall thickness. Mean wall thickness was increased by 42% in the smokers ( $p=.02$  compared to control) and this effect was completely prevented by AZ11557272.

Table 1 shows correlations between surface to volume ratio (Sv) and other measures at 6 months, and also correlations between serum TNF $\alpha$  and other measures at 1 and 3 months. These

calculations were performed over the entire set of animals. In univariate analyses, at 6 months there was a strong inverse correlation between Sv and lavage desmosine ( $r=-.82$   $p<.0001$ ), serum TNF $\alpha$  ( $r=-.87$ ,  $p<.0001$ ) and less strong but still highly significant correlations with inflammatory cell numbers in lavage. Almost identical positive correlations were seen with airspace size (Lm) and desmosine, serum TNF $\alpha$ , and inflammatory cell numbers (data not shown). At all time periods serum TNF $\alpha$  levels showed strong correlations with desmosine levels and with numbers of lavage inflammatory cells. Desmosine levels also showed somewhat less strong but still quite significant correlations with numbers of inflammatory cells.

**Table 1 Correlations Among Lavage Desmosine, Inflammatory Cell Numbers, Serum TNF $\alpha$  , and Airspace Enlargement**

| <b>Time/Comparison</b>                 | <b>R (p value)</b> |
|----------------------------------------|--------------------|
| <b>1 Month</b>                         |                    |
| Serum TNF $\alpha$ -Desmosine          | R=.89 (p<.0001)    |
| Serum TNF $\alpha$ -Lavage Neutrophils | R=.81 (p<.0001)    |
| Serum TNF-Lavage Macrophages           | R=.83 (p<.0001)    |
| Desmosine-Lavage neutrophils           | R=0.64 (p=.0005)   |
| Demosine-Lavage macrophages            | R=0.73 (p<.0001)   |
| <b>3 Months</b>                        |                    |
| Serum TNF $\alpha$ -Desmosine          | R=.84 (p<.0001)    |
| Serum TNF $\alpha$ -Lavage Neutrophils | R=.81 (p<.0001)    |

|                              |                 |
|------------------------------|-----------------|
| Serum TNF-Lavage Macrophages | R=.53 (p=.008)  |
| Desmosine-Lavage Neutrophils | R=.78 (p<.0001) |
| Desmosine-Lavage Macrophages | R=.49 (p=.009)  |

### 6 Months

|                                        |                   |
|----------------------------------------|-------------------|
| Serum TNF $\alpha$ -Lavage Desmosine   | R=.84 (p<.0001)   |
| Serum TNF $\alpha$ -Lavage Neutrophils | R=.52 (p=.009)    |
| Serum TNF $\alpha$ -Lavage Macrophages | R=.89 (p<.0001)   |
| Sv-Lavage Desmosine                    | R= -.82 (p<.0001) |
| Sv-Serum TNF $\alpha$                  | R= -.87 (p<.0001) |
| Sv-Lavage Macrophages                  | R= -.56 (p=.004)  |
| Sv-Lavage Neutrophils                  | R= -.54 (p=.007)  |

### Discussion

In this paper we have shown that an MMP-9/-12 inhibitor with good selectivity over other most other MMPs ameliorates emphysema and prevents smoke-induced increases in small airway wall thickness in a guinea pig model. One possible criticism of this study is the relatively high dose of compound used. In our acute range-finding model, which uses a single smoke exposure with sacrifice at 24 hours, AZ11557272 suppressed macrophage numbers and increases in serum TNF $\alpha$  at a relatively low dose. However, because, in the acute smoke exposure model, neutrophil numbers but not macrophage numbers in lavage correlate with increased levels of lavage desmosine [12], we picked a considerably higher dose in order to suppress neutrophils

influx (this phenomenon changes with chronic exposure models, where, as here, there is a correlation of lavage desmosine with lavage macrophages as well). One could argue that the dose used here in the chronic study was suppressing many MMPs, but given the relative selectivity data described in the Materials and Methods, the blood levels of AZ11557272 achieved should not have suppressed most MMPs other than MMP-9 and MMP-12, and in particular will not suppress MMP-1, which has been implicated in human emphysema (see below), but probably suppressed MMP-8 (see below). These observations also suggest that the exact roles played by MMP-9 and MMP-12 (and other MMPs) in the inflammatory response to smoke as well as the genesis of emphysema and small airway remodeling are complex.

Although there has been evidence for a number of years that proteases other than serine proteases are present in increased amounts in the lungs of smokers (indeed, even in 1983, Janoff et al [13] noted that 50% of the elastase activity in lavage fluid from cigarette smokers was metalloprotease-derived), the central role of metalloproteases was really brought to the fore by the observation that mice lacking MMP-12 were completely protected against smoke-induced emphysema. [4]. Subsequently it has been shown that different synthetic broad spectrum metalloprotease inhibitors provide 75 to 100% protection [14][15] in mice (see below and Table 2).

These observations have lead to the assumption that metalloproteases are also crucial effectors of emphysema in humans. MMP-1, -2, -9, -14 [16][17][18][19] and in some but not all reports, MMP-12 [18] [20][21][22][23], can be found in greater amounts in sputum or lavage fluid or cultured alveolar macrophage supernatant from smokers with emphysema compared to those without. Based on data from cultured macrophages, it has been proposed that it is

specifically MMP-9 that is the crucial MMP in humans [24][25]. Data on metalloprotease gene promoter region polymorphisms have also suggested a role for MMP-1, MMP-12, [26] and possibly MMP-9 [26][27] in COPD. However, the actual role of metalloproteases in general, and of specific types of metalloproteases, in humans is unknown.

A major complication in extrapolating from mouse models are the observations that different species produce different types of metalloproteases, or relatively greater or lesser amounts of a given metalloprotease, and that these metalloproteases sometimes have different functions. For example, mice do not have a true MMP-1 (a collagenase), and mice and humans differ, in some models, in the metalloproteases that break down elastin, an important part of the pathogenesis of emphysema. Thus in explanted aortic fragments, both murine and human macrophages use basal levels of MMP-12 to degrade elastin, but human macrophages stimulated with plasminogen switch on production of MMP-7, which becomes the major elastolytic enzyme in this model, whereas this phenomenon does not occur with murine macrophages.[28] As well, despite evidence that smoke-stimulated human alveolar macrophages produce large amounts of MMP-9, [24] in the mouse knockout of MMP-9 does not prevent the development of emphysema (SD Shapiro, personal communication).

Our observations help bridge the gap between mouse models and humans by showing that metalloproteases are involved in the pathogenesis of emphysema in a non-murine species, and, further, that MMP-9 and/or MMP-12 are the most important types of metalloproteases involved. To our knowledge, the only previous study of a metalloprotease inhibitor in smoke-exposed guinea pigs was that of Selman et al [29] who used CP-471,474, a broad spectrum inhibitor; they found 100% percent protection against increases in airspace size at 2 months, but

only 30% at 4 months, a result that implies that metalloprotease inhibition does not provide significant protection against emphysema in this species, contrary to what we have observed.

There is clear evidence in our model that smoke exposure produces increased levels of whole lung MMP-12 and MMP-9; the latter change must be interpreted with caution, since much of the MMP-9 may be derived from smoke-evoked neutrophils, but the data on MMP-12 imply that this metalloprotease may be increased by smoke exposure in multiple species. Presumably the major source of MMP-12 in the guinea pigs is alveolar macrophages, but no direct data exist on this question. By the same token, however, our data imply that MMP-9 and/or -12 account for only about 70% of airspace enlargement in guinea pigs. What the source of the remaining 30% of airspace enlargement might be is unclear. Metalloproteases other than MMP-9 and MMP-12 (particularly MMP-1, which has been shown to produce emphysema when expressed in transgenic mice [30] and which is not inhibited by AZ11557272), or completely different types of proteases, or a protease-independent mechanism are all possibilities. As noted above, our protocol probably suppressed MMP-8 activity. Betsuyaku et al [31] have reported parallel increases in MMP-8 and MMP-9 as a consequence of neutrophil influx in the lungs of patients with emphysema, but the actual role, if any, of MMP-8 in human emphysema is not known. It is possible, but appears unlikely, that suppression of MMP-8, a collagenase, is affecting our results in a major fashion.

One of the processes that has been proposed as a cause of emphysema is smoke-induced apoptosis of endothelial and/or epithelial cells. Chemical inhibition of VEGF-receptor 2, [32] or intratracheal instillation of active caspase-3 or nodularin [33] produces extremely rapid airspace enlargement in the absence of an inflammatory cell influx. In humans some studies have found

increased numbers of apoptotic cells in emphysematous compared to nonemphysematous lungs [34][35][36]. However, at least with caspase-3 or nodularin, the airspace enlargement is rapidly reversible, but this is not the case in our cigarette smoke models. [37] Further, although there was increased lavage elastolytic activity in the caspase-3 instillation model, [33] the activity was maximal at pH 5.5 and the authors proposed that this represented activation of one or more cathepsins.

While our current observations do not address the issue of apoptosis directly, they do suggest that it is not the most important cause of airspace enlargement. Rather we found a very strong correlation between measures of surface to volume ratio or airspace size and levels of lavage desmosine, a marker of elastin breakdown. Although there is a general assumption that markers of matrix breakdown should correlate with the severity of emphysema, this is the first demonstration that such a correlation exists, and the fact that AZ11557272 prevented increases in desmosine levels indicates that metalloproteases are, either directly or indirectly, driving matrix breakdown. These findings complement the recent report of Houghton et al [38] that elastin fragments generated by proteolytic activity in the smoke-exposed lung drive monocyte recruitment and disease progression, and that MMP-12 is crucial to this process. These observations would fit with the comment made by Imai et al [35] that a correlation between severity of emphysema and numbers of apoptotic cells does not necessarily imply that apoptosis causes emphysema, but could simply mean that damage to or loss of matrix leads to apoptosis of the overlying epithelial cells, a well known phenomenon.

In addition, in our model there were strong correlations of surface to volume ratio and serum TNF $\alpha$  levels, and of desmosine levels, serum TNF $\alpha$  levels and numbers of lavage

neutrophils and macrophages. The conclusion from this whole set of observations is that the classic inflammation-driven model of matrix breakdown is the major driving force behind matrix destruction in emphysema.

In this context it is useful to compare the levels of protection we achieve with AZ11557272 and other antiproteases and anti-inflammatory agents reported in the literature. Since the published data is usually expressed in terms of airspace size (Lm), we have used that measure in compiling Table 2. In general MMP inhibitors or MMP knockout (in the case of MMP-12) appear to provide somewhat more protection than serine elastase inhibitors or knockout of neutrophil elastase, but there is still considerable variation from study to study and overlap among the groups. Comparable levels of protection are achieved using anti-inflammatory agents (Roflumilast, Simvastatin) or TNF $\alpha$  receptor knockout mice. While these data suggest that enzyme inhibitors or anti-inflammatory agents could produce quite significant protection, it should be noted that in almost all of the reported protocols, the drug treatment or target gene deletion is present from the first day of exposure to smoke. This is quite different from the situation in humans where drug treatment will probably be a relatively late intervention with the intent to prevent progression of established emphysema, or airway disease.

**Table 2: Protection Against Smoke-Mediated Increases in Airspace Size**

**Serine Elastase Inhibitors/Interference with Neutrophil Elastase**

|                                                |     |
|------------------------------------------------|-----|
| ZD0892 (guinea pig)[39]                        | 45% |
| $\alpha$ -1-antitrypsin (injected) (mice) [40] | 63% |
| $\alpha$ -1-antitrypsin (inhaled) (mice) [41]  | 72% |
| Neutrophil elastase knockout (mice) [42]       | 59% |



### **Metalloprotease Inhibitors/Interference with Metalloproteases**

|                                                          |        |
|----------------------------------------------------------|--------|
| Broad spectrum MMP inhibitor GM6001 (mice) [15]          | 90%*** |
| Broad spectrum MMP inhibitor RS113456 (mice) [14]*       | 100%   |
| Broad spectrum MMP inhibitor RS132908 (mice) [14]        | 75%    |
| MMP-12 knockout (mice) [4]                               | 100%   |
| MMP-9/-12 inhibitor (current study) (guinea pig)         | 68%    |
| MMP inhibitor CP-471,474 at 2 months** (guinea pig) [29] | 100%   |
| MMP inhibitor CP-471,474 at 4 months** (guinea pig) [29] | 30%    |

### **Anti-Inflammatory Treatments/Genetic Manipulations**

|                                                 |      |
|-------------------------------------------------|------|
| TNF $\alpha$ Receptor I/II knockout (mice) [11] | 71%  |
| PDE4 inhibitor Roflumilast (mice) [43]          | 100% |
| Simvastatin (rats) [44]                         | 100% |

\* Started after 3 months of smoke exposure \*\* Alveolar area measured

\*\*\* average value from 2 highest doses

Although it is now accepted that small airway remodeling is an important contributor to airflow obstruction, [45] little is known about the pathogenesis of this lesion. The usual assumption is that small airway remodeling, like emphysema, is an effect of smoke-induced inflammation, but this assumption is more of an afterthought than an idea with evidence behind it.[6] We have suggested elsewhere that in fact small airway remodeling may be caused by

direct smoke effects that lead to the induction of profibrotic growth factors, particularly TGF $\beta$ , in the airway walls. [46] The fact that AZ11557272 protects against small airway remodeling is surprising and suggests that either smoke-induced inflammation is actually important in remodeling, or, alternately, that induction of MMPs in the airway wall itself plays a major role. This latter idea is attractive, since MMPs not only reorganize matrix but are now known to release growth factors including insulin-like growth factors and TGF $\beta$  from matrix, effectively converting them to active forms.[47] MMP-9 in particular has been shown to activate TGF $\beta$  in some model systems [48], and intratracheal instillation of TGF $\beta$  to mice has been shown to produce increased collagen in small airway walls without evoking an inflammatory response.[49]

Another unexpected finding in our model is the total lack of effect of AZ11557272 on smoke-induced pulmonary hypertension. In hypoxia [50] or monocrotaline [51] model pulmonary hypertension systems, administration of a broad spectrum MMP inhibitor *in vivo* reduces vascular remodeling. Batimastat, a nonselective MMP inhibitor, functioning mainly against collagenases, markedly reduced collagen breakdown and collagenolytic activity in the pulmonary arteries, and reduced hypoxia-induced pulmonary hypertension. [50] Inhibition of MMPs by GM6001, a very broad spectrum metalloprotease inhibitor, in a cultured pulmonary artery system produced suppression of monocrotaline-induced cell proliferation and matrix production, followed by regression of vascular wall thickening.[51] The inhibitor appeared to have its greatest effect on MMP-2, although activity of other MMPs was also decreased.

Given the species to species differences in the role of specific metalloproteases noted above, one needs to be cautious in drawing conclusions, but it is possible that, in the guinea pig, MMP-9 and MMP-12 are not crucial to the development of smoke-induced vascular remodeling

and pulmonary hypertension.

In summary, we have shown here for the first time that metalloproteases play a role in the development of emphysema in a species other than the mouse, and, more specifically, that MMP-9 and/or MMP-12 are the major players in this process; as well we have demonstrated that MMPs are important in the pathogenesis of small airway remodeling. Previously published data in the mouse using broad spectrum MMP inhibitors [14][15] have indicated a potential role for such compounds as a therapeutic approach to emphysema; our findings extend these results and are of particular interest because of the known role of MMP-12 in driving emphysema in the mouse and the belief that MMP-9, and possibly MMP-12, are important in emphysema in humans (see above) These observations thus provide support for the idea that metalloproteases also are likely to be important in the pathogenesis of emphysema and small airway remodeling in humans, and suggest some specific targets of antiprotease therapy.

**Acknowledgements**

Supported by grant MOP 42539 from the Canadian Institutes of Health Research and a grant from AstraZeneca R&D, Lund, Sweden

The Corresponding Author has the right to grant on behalf of all authors and does grant on behalf of all authors, an exclusive licence (or non exclusive for government employees) on a worldwide basis to the BMJ Publishing Group Ltd and its Licensees to permit this article (if accepted) to be published in THORAX and any other BMJPG Ltd products to exploit all subsidiary rights, as set out in our licence.

## References

- 1 Gross P, Pfitzer EA, Toker A et al. Experimental emphysema: its production with papain in normal and silicotic rats. *Arch Environ Health* 1965; 11: 50-58
- 2 Laurell CB, Eriksson S. The electrophoretic alpha-1-globulin pattern of serum in alpha-1-antitrypsin deficiency. *Scand J Clin Invest* 1963; 15: 132-140.
- 3 Shapiro SD, Goldstein NM, Houghton AM et al. Neutrophil elastase contributes to cigarette smoke-induced emphysema in mice. *Am J Pathol* 2003; 163: 2329-2335.
- 4 Hautamaki, R, Kobayashi D, Senior R, Shapiro S. Requirement for macrophage elastase for cigarette smoke-induced emphysema in mice. *Science* 1997; 277: 2002-2004.
- 5 Churg A, Wang RD, Tai H et al. Macrophage metalloelastase mediates acute cigarette smoke-induced inflammation via tumor necrosis factor- $\alpha$  release. *Amer J Respir Crit Care Med* 2003; 167: 1083-1089.
- 6 Jeffery PK: Remodeling in asthma and chronic obstructive lung disease. *Amer J Respir Crit Care Med* 2001; 164: S28-S38
- 7 Wright JL, Churg A. Cigarette smoke causes physiologic and morphologic changes of

emphysema in the guinea pig. *Am Rev Respir Dis* 190; 142:1422 -1428.

8 Wright JL, Churg A. Effect of long-term cigarette smoke exposure on pulmonary vascular structure and function in the guinea pig. *Exp Lung Res* 191; 17:997 -1009.

9 Thurlbeck WM. Christie Lecture: Emphysema then and now. *Can Respir J* 1994; 1:21 -39.

10 Li K, Keeling B, Churg A: Mineral dusts cause collagen and elastin breakdown in the rat lung: a potential mechanism of dust-induced emphysema. *Amer J Respir Crit Care Med* 1996; 153: 644-649.

11 Churg A, Wang RD, Tai H et al. Tumor necrosis factor- $\alpha$  drives 70% of cigarette smoke-induced emphysema in the mouse. *Amer J Respir Crit Care Med* 2004; 170: 492-498.

12. Dhimi R, Gilks B, Xie C, Zay K, Wright J, Churg A: Acute cigarette smoke-induced connective tissue breakdown is mediated by neutrophils and prevented by  $\alpha$ -1-antitrypsin. *Amer J Respir Cell Molec Biol* 2000; 22:244-252.

13 Janoff A, Raju L, Dearing R: Levels of elastase activity in bronchoalveolar lavage fluids of healthy smokers and nonsmokers. *Am Rev Respir Dis* 1983; 127: 540-544.

14 Martin RL, Shapiro SD, Tong SE, Van Wart H. Macrophage metalloelastase inhibitors.

In: *New Drugs for Asthma, Allergy and COPD*, Hansel TT, Barnes PJ editors. *Prog Respir Res* 2001; 31:177-180.

15 Pemberton PA, Cantwell JS, Kim KM et al. An Inhaled matrix metalloprotease inhibitor prevents cigarette smoke-induced emphysema in the mouse. *J COPD* 2005; 2: 303-310.

16 Ohnishi K, Takagi M, Kurokawa Y, et al. Matrix metalloproteinase-mediated extracellular matrix protein degradation in human pulmonary emphysema. *Lab Invest* 1998; 78: 1077-1086.

17 Finlay GA, LR O'Driscoll, KJ Russell et al. Matrix metalloproteinase expression and production by alveolar macrophages in emphysema. *Am J Respir Crit Care Med* 1997; 156: 240-247.

18 Imai K, Dalal SS, Chen ES et al. Human collagenase (matrix metalloproteinase-1) expression in the lungs of patients with emphysema. *Am J Respir Crit Care Med* 2001; 163: 786-791.

19 Segura-Valdez L, Pardo A, Gaxiola M et al. Upregulation of gelatinases A and B, collagenases 1 and 2, and increased parenchymal cell death in COPD. *Chest* 2000; 117: 684-694.

20 Demedts IK, Morel-Montero A, Lebecque S et al. Elevated MMP-12 protein levels in induced sputum from COPD patients. *Thorax* 2006; 61:196-2015.

- 21 Molet S, Belleguic C, Lena H et al. Increase in macrophage elastase (MMP-12) in lungs from patients with chronic obstructive pulmonary disease. *Inflamm Res* 2005; 54: 31-36.
- 22 Grumelli S, Corry DB, Song LZ et al. An immune basis for lung parenchymal destruction in chronic obstructive pulmonary disease and emphysema. *PLoS Med* 2004 1:e8. Epub 2004 Oct 19.
- 23 Woodruff PG, Koth LL, Yang YH et al. A distinctive alveolar macrophage activation state induced by cigarette smoking. *Am J Respir Crit Care Med* 2005; 172:1383-1392.
- 24 Russell RE, Thorley A, Culpitt SV et al. Alveolar macrophage-mediated elastolysis: roles of matrix metalloproteinases, cysteine, and serine proteases. *Am J Physiol Lung Cell Mol Physiol* 2002; 283: L867-L873.
- 25 Russell RE, Culpitt SV, DeMatos C et al. Release and activity of matrix metalloproteinase-9 and tissue inhibitor of metalloproteinase-1 by alveolar macrophages from patients with chronic obstructive pulmonary disease. *Am J Respir Cell Mol Biol* 2002; 26: 602-609.
- 26 Joos L, He JQ, Shepherdson MB, Connett JE et al. The role of matrix metalloproteinase polymorphisms in the rate of decline in lung function. *Hum Mol Genet* 2002; 11: 569-576.
- 27 Ito I, Nagai S, Handa T et al. Matrix metalloproteinase-9 promoter polymorphism associated with upper lung dominant emphysema. *Am J Respir Crit Care Med* 2005; 172:1378-1382.



28 Filippov S, Caras I, Murray R et al. Matrilysin-dependent elastolysis by human macrophages. *J Exp Med* 2003; 198: 925-935.

29 Selman M, Cisneros-Lira J, Gaxiola M et al. Matrix metalloproteinases inhibition attenuates tobacco smoke-induced emphysema in Guinea pigs. *Chest* 2003; 123:1633-1641.

30 Foronjy RF, Okada Y, Cole R, D'Armiento J. Progressive adult-onset emphysema in transgenic mice expressing human MMP-1 in the lung. *Am J Physiol Lung Cell Mol Physiol* 2003; 284:L727-L737.

31 Betsuyaku T, Nishimura M, Takeyabu K, Tanino M, Venge P, Xu S, Kawakami Y. Neutrophil granule proteins in bronchoalveolar lavage fluid from subjects with subclinical emphysema. *Am J Respir Crit Care Med* 1999;159: 1985-1991.

32 Kasahara Y, Tudor RM, Taraseviciene-Stewart L et al. Inhibition of VEGF receptors causes lung cell apoptosis and emphysema. *J Clin Invest* 2000; 106:1311-1319.

33 Aoshiba K, Yokohori N, Nagai A. Alveolar wall apoptosis causes lung destruction and emphysematous changes. *Am J Respir Cell Mol Biol* 2003; 28: 555-562.

34 Yokohori N, Aoshiba K, Nagai A. Increased levels of cell death and proliferation in alveolar

wall cells in patients with pulmonary emphysema. *Chest* 2004; 125: 626-632.

35 Tuder RM, Petrache I, Elias JA et al. Apoptosis and emphysema: the missing link. *Am J Respir Cell Mol Biol* 2003; 28: 551-554.

36 Imai K, Mercer BA, Schulman LL et al. Correlation of lung surface area to apoptosis and proliferation in human emphysema. *Eur Respir J* 2005; 25:250-258.

37 Wright JL, Sun J-P. The effect of smoking cessation on pulmonary and cardiovascular function and structure. *J Appl Physiol* 1994; 76:2163 -2168.

38 Houghton AM, Quintero PA, Perkins DL et al. Elastin fragments drive disease progression in a murine model of emphysema. *J Clin Invest.* 2006; 116: 753-759.

39. Wright JL, Farmer S, Churg A: A synthetic serine elastase inhibitor reduces cigarette smoke induced emphysema in guinea pigs. *Amer J Respir Crit Care Med* 2002; 166: 954-960.

40. Churg A, Wang RD, Xie C, Wright JL:  $\alpha$ -1-Antitrypsin Ameliorates Cigarette Smoke-Induced Emphysema In The Mouse. *Amer J Respir Crit Care Med* 2003; 168: 199-207.

41. Pemberton PA, Kobayashi D, Wilk BJ et al. Inhaled recominant alpha-1-antitrypsin ameliorates cigarette smoke-induced emphysema in the mouse. *COPD: J of COPD.* 2006; 3: 101-108.

42. Shapiro SD, Goldstein NM, Houghton AM et al. Neutrophil elastase contributes to cigarette smoke-induced emphysema in mice. *Am J Pathol* 2003; 163: 2329-2335.
43. Martorana PA, Beume R, Lucattelli M et al. Roflumilast fully prevents emphysema in mice chronically exposed to cigarette smoke. *Am J Respir Crit Care Med* 2005; 172:848-853.
- 44 Lee JH, Lee DS, Kim EK et al. Simvastatin inhibits cigarette smoking-induced emphysema and pulmonary hypertension in rat lungs. *Am J Respir Crit Care Med* 2005;172: 987-993.
- 45 Hogg JC, Chu F, Utokaparch S et al. The nature of small-airway obstruction in chronic obstructive pulmonary disease. *N Engl J Med* 2004; 350:2645-2653.
46. Churg A, Tai H, Coulthard T, Wang R, Wright JL: Cigarette Smoke Drives Small Airway Remodeling by Induction of Growth Factors in the Airway Wall. *Am J Respir Crit Care Med*, 2006 Sep 28; [Epub ahead of print ahead of print]
- 47 Winkler MK, Fowlkes JL. Metalloproteinase and growth factor interactions: do they play a role in pulmonary fibrosis? *Am J Physiol Lung Cell Mol Physiol* 2002; 283:L1-L11.
48. Atkinson JJ, Senior RM. Matrix metalloproteinase-9 in lung remodeling. *Am J Respir Cell Mol Biol* 2003; 28:12-24.

49 Kenyon NJ, Ward RW, McGrew G, Last JA. TGF- $\beta$ 1 causes airway fibrosis and increased collagen I and III mRNA in mice. *Thorax* 2003; 58: 772-777.

50 Herget J, Novotna J, Bibova J et al. Metalloproteinase inhibition by Batimastat attenuates pulmonary hypertension in chronically hypoxic rats. *Am J Physiol* 2003; 285:L199 -L208.

51 Cowan KN, Jones PL, Rabinovitch M. Elastase and matrix metalloproteinase inhibitors induce regression, and tenascin-C antisense prevents progression, of vascular disease. *J Clin Invest* 2000; 105:21 -34.

## Figure legends

1) Lavage inflammatory cells. Smoke exposure increases both neutrophil and macrophage numbers at all time periods (3 months not shown) and these increases are abolished by treatment with AZ11557272. In this and all other figures, the numbers of animals at 1 month are 6 control, 10 smoke-exposed, and 10 exposed to AZ11557272; at 3 months 8, 8, and 10, and at 6 months 6, 10, and 8 respectively. Values are mean  $\pm$  SD. \* indicates  $p < .001$  or less compared to controls.

2) Lavage desmosine and serum TNF $\alpha$  levels at 1 and 6 months. Desmosine, a marker of elastin breakdown, is increased by smoke exposure at all time points; AZ11557272 completely prevents this effect. TNF $\alpha$  levels are increased by cigarette smoke exposure at all time points and AZ11557272 completely prevents this effect. Values are mean  $\pm$  SD. \* indicates  $p < .001$  or less compared to controls.

3) Top: Whole lung MMP-9 levels (Western blot) on 3 animals from each treatment group. Smoke exposure significantly increases whole lung MMP-9 at all time points and AZ11557272 partially prevents this effect. Values are mean  $\pm$  SD. \* indicates  $p < .01$  comparing control and smoke exposed,  $p < .05$  comparing control and AZ11557272 exposed. Bottom: Whole lung MMP-12 levels (Western blot) on 3 animals from each treatment group. Smoke markedly increases whole lung MMP-12 at 1 month and produces lesser but still significant increases at 3 and 6 months. AZ11557272 completely prevents this effect. Values are mean  $\pm$  SD. \* indicates  $p < .01$  comparing control and smoke exposed.

4) Pressure volume curves at 6 months of smoke exposure. Mice exposed to smoke show significantly increased TLC at all inflating pressures. AZ11557272 completely prevents this effect. Values are mean  $\pm$  SD. \* indicates  $p < .01$  or less comparing control vs smoke exposed;  $p < .01$  or less comparing AZ11557272 treated vs smoke exposed (except  $p < .03$  at baseline and 5cm H<sub>2</sub>O pressure) (Analysis by repeated measure ANOVA).

5) Top: Representative images of control, smoke exposed, and AZ11557272 treated animals at 6 months showing clear increases in airspace size with smoke and protection with AZ11557272. Lower left: airspace size measured as Lm. Smoke increases Lm and AZ11557272 provides 68% protection. Lower right: Surface to volume ratio (Sv): smoke decreases Sv and AZ11557272 provides 57% protection. Values are mean  $\pm$  SD. \* indicates  $p < .0001$  comparing control to smoke exposed, and  $p < .001$  comparing control to AZ11557272 treated group.

6) Top: Representative images of control, smoke exposed, and AZ11557272 treated animals at 6 months showing a representative membranous bronchiole. Smoke increases bronchiolar wall thickness (ie, produces small airway remodeling) and this is prevented by AZ11557272. Graphical representation of data from all the animals is shown below. Values are mean  $\pm$  SD. \* indicates  $p < .02$  compared to controls.

### On-line supplement figures

Supplement Figure 1: Lavage neutrophils as a function of AZ11557272 dose. N=5 animals/group. Values are mean  $\pm$  SD. \* indicates  $p < .0001$  control vs smoke;  $p < .05$  control vs 3mg/kg;  $p < .01$  control vs 10mg/kg.

Supplement Figure 2: Serum TNF $\alpha$  as a function of AZ11557272 dose. Note suppression of smoke-induced TNF $\alpha$  elevations at low doses. Values are mean  $\pm$  SD. \* indicates  $p < .01$  compared to controls.

Supplement Figure 3: Lavage macrophages as a function of AZ11557272 dose. Values are mean  $\pm$  SD. Increase in macrophage numbers is close to significant ( $p < .08$ ) comparing control and smoke, and there is a significant decrease in macrophage numbers, even at 3mg/kg ( $p < .01$  comparing numbers of macrophages in smokers to numbers at a dose of 3mg/kg).

Supplement Figure 4: Pulmonary function data at 6 months of smoke exposure. Smoke produces significant increases in TLC, VC, and RV, and AZ11557272 provides about 70% protection. Values are mean  $\pm$  SD. \* indicates  $p < .01$  comparing TLC or VC in smoke and control,  $p < .05$  for other comparisons.

Supplement Figure 5: Pulmonary artery pressure at 6 months of smoke exposure. Smoke increases Ppa by about 25%. This increase is not prevented by treatment with AZ11557272.

Values are mean  $\pm$  SD. \*  $p < .01$  for control vs smoke,  $p < .03$  for control vs AZ11557272
