# Supplementary material
Source: PubMed Central journal article supplement (PMC2117295)
Supplement: thorax_thx.2006.068353_2.pdf [file thorax_thx.2006.068353_2.pdf]

### On-line supplement figures

Supplement Figure 1: Lavage neutrophils as a function of AZ11557272 dose. N=5 animals/group. Values are mean  $\pm$  SD. \* indicates  $p < .0001$  control vs smoke;  $p < .05$  control vs 3mg/kg;  $p < .01$  control vs 10mg/kg.

Supplement Figure 2: Serum TNF $\alpha$  as a function of AZ11557272 dose. Note suppression of smoke-induced TNF $\alpha$  elevations at low doses. Values are mean  $\pm$  SD. \* indicates  $p < .01$  compared to controls.

Supplement Figure 3: Lavage macrophages as a function of AZ11557272 dose. Values are mean  $\pm$  SD. Increase in macrophage numbers is close to significant ( $p < .08$ ) comparing control and smoke, and there is a significant decrease in macrophage numbers, even at 3mg/kg ( $p < .01$  comparing numbers of macrophages in smokers to numbers at a dose of 3mg/kg).

Supplement Figure 4: Pulmonary function data at 6 months of smoke exposure. Smoke produces significant increases in TLC, VC, and RV, and AZ11557272 provides about 70% protection. Values are mean  $\pm$  SD. \* indicates  $p < .01$  comparing TLC or VC in smoke and control,  $p < .05$  for other comparisons.

Supplement Figure 5: Pulmonary artery pressure at 6 months of smoke exposure. Smoke increases Ppa by about 25%. This increase is not prevented by treatment with AZ11557272. Values are mean  $\pm$  SD. \*  $p < .01$  for control vs smoke,  $p < .03$  for control vs AZ11557272
