# Supplementary material
Source: PubMed Central journal article supplement (PMC2117295)

## Lavage Neutrophils as a Function of AZ11557272 Dose

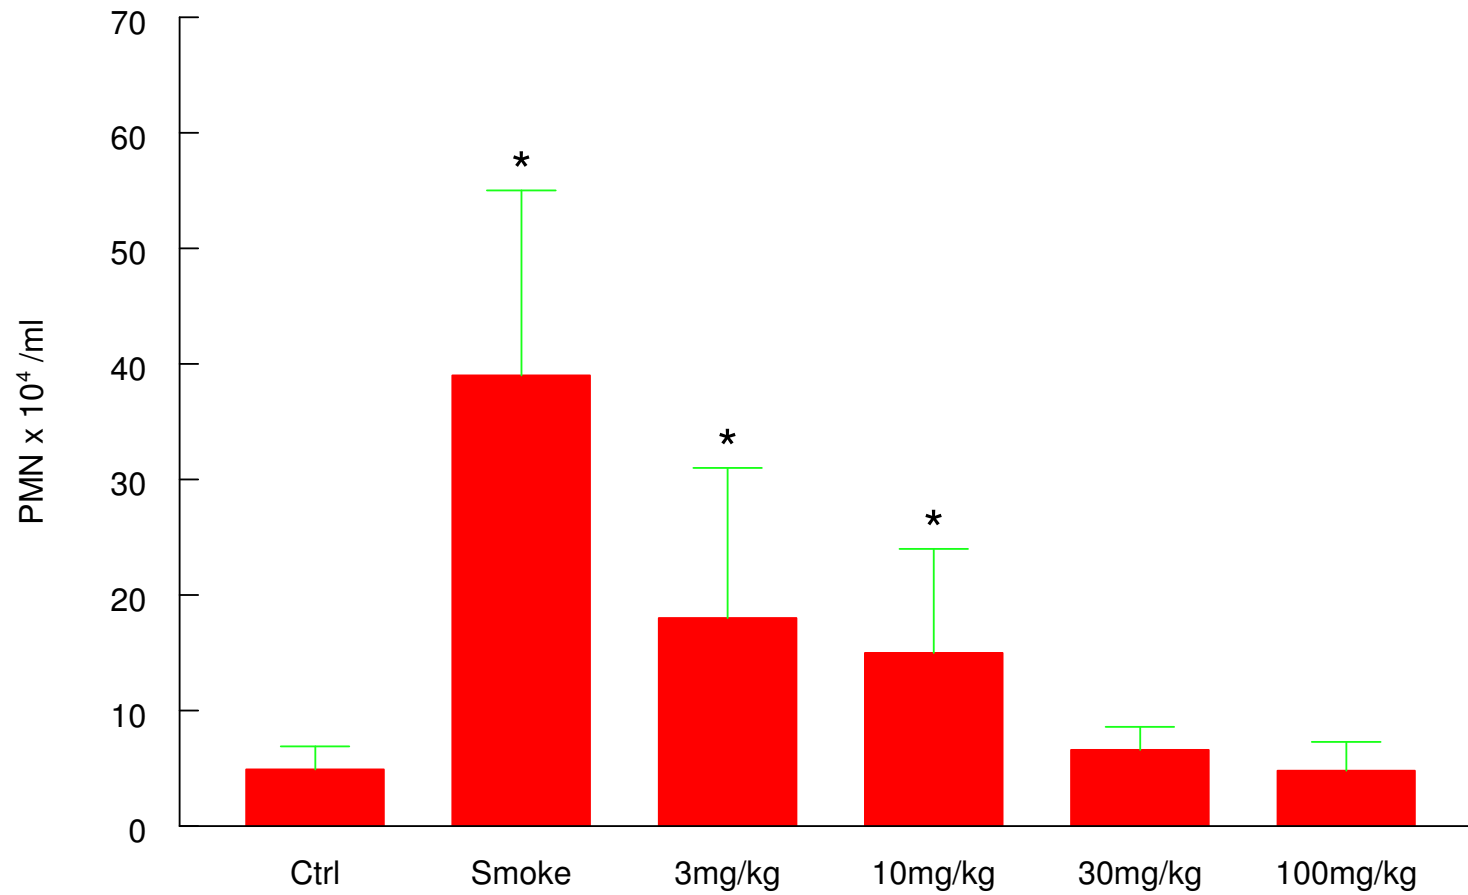

Supplement Figure 1

Supplement: thorax_thx.2006.068353_3.pdf [file thorax_thx.2006.068353_3.pdf]

## Serum TNF $\alpha$ as a Function of AZ11557272 Dose

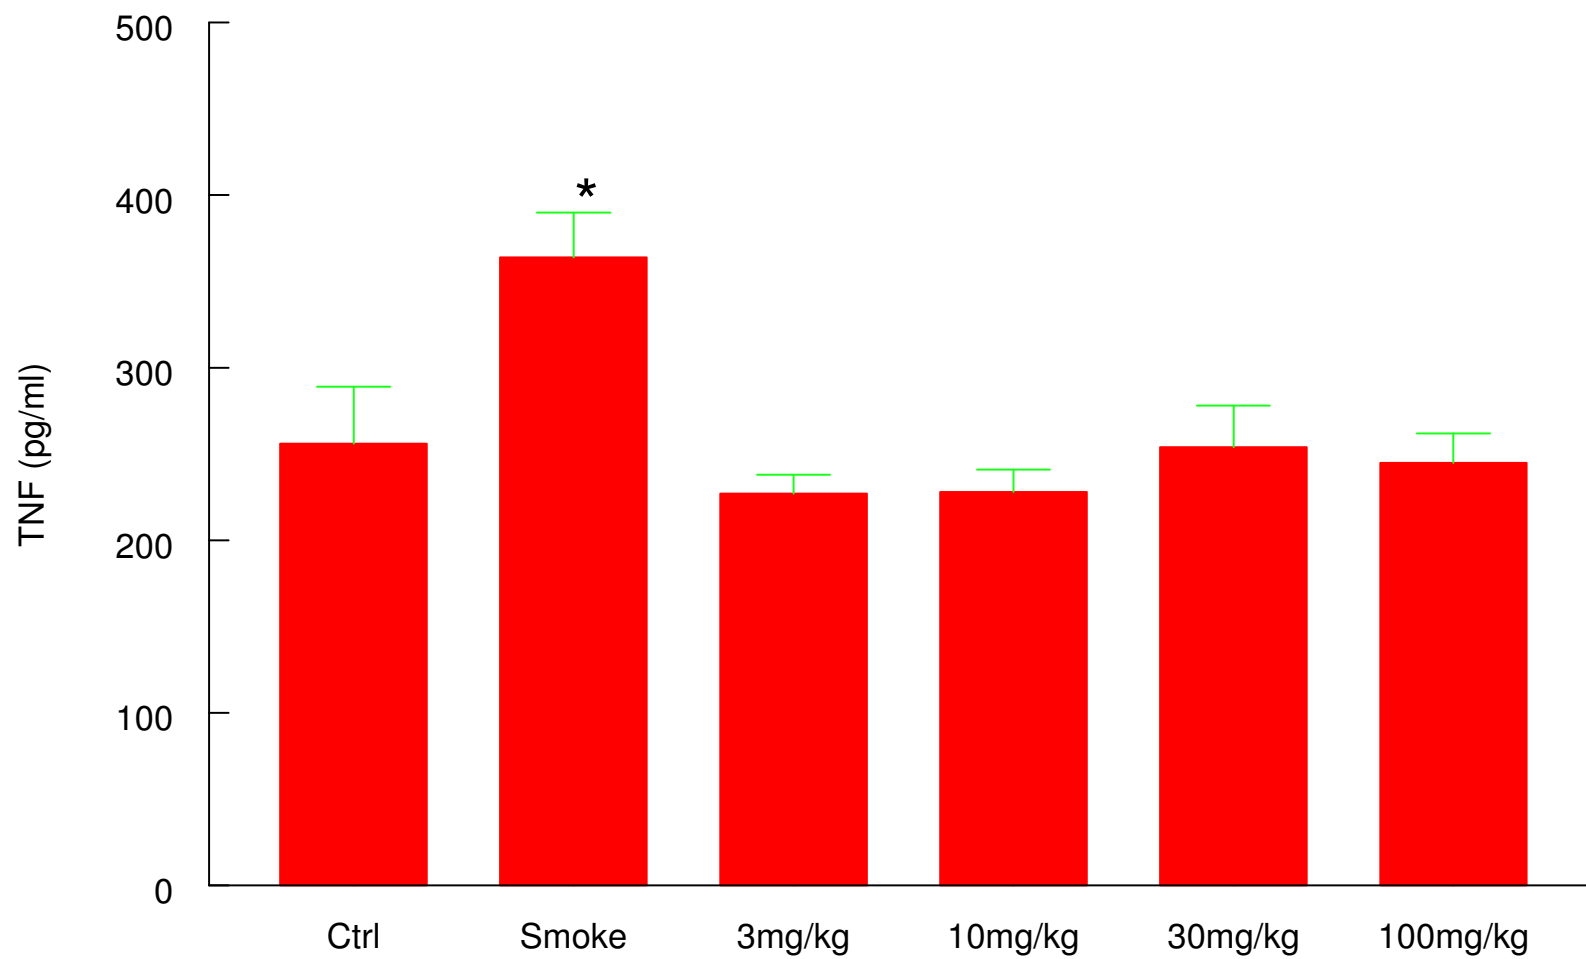

Supplement Figure 2

Supplement: thorax_thx.2006.068353_4.pdf [file thorax_thx.2006.068353_4.pdf]

# Lavage Macrophages as a Function of AZ11557272 Dose

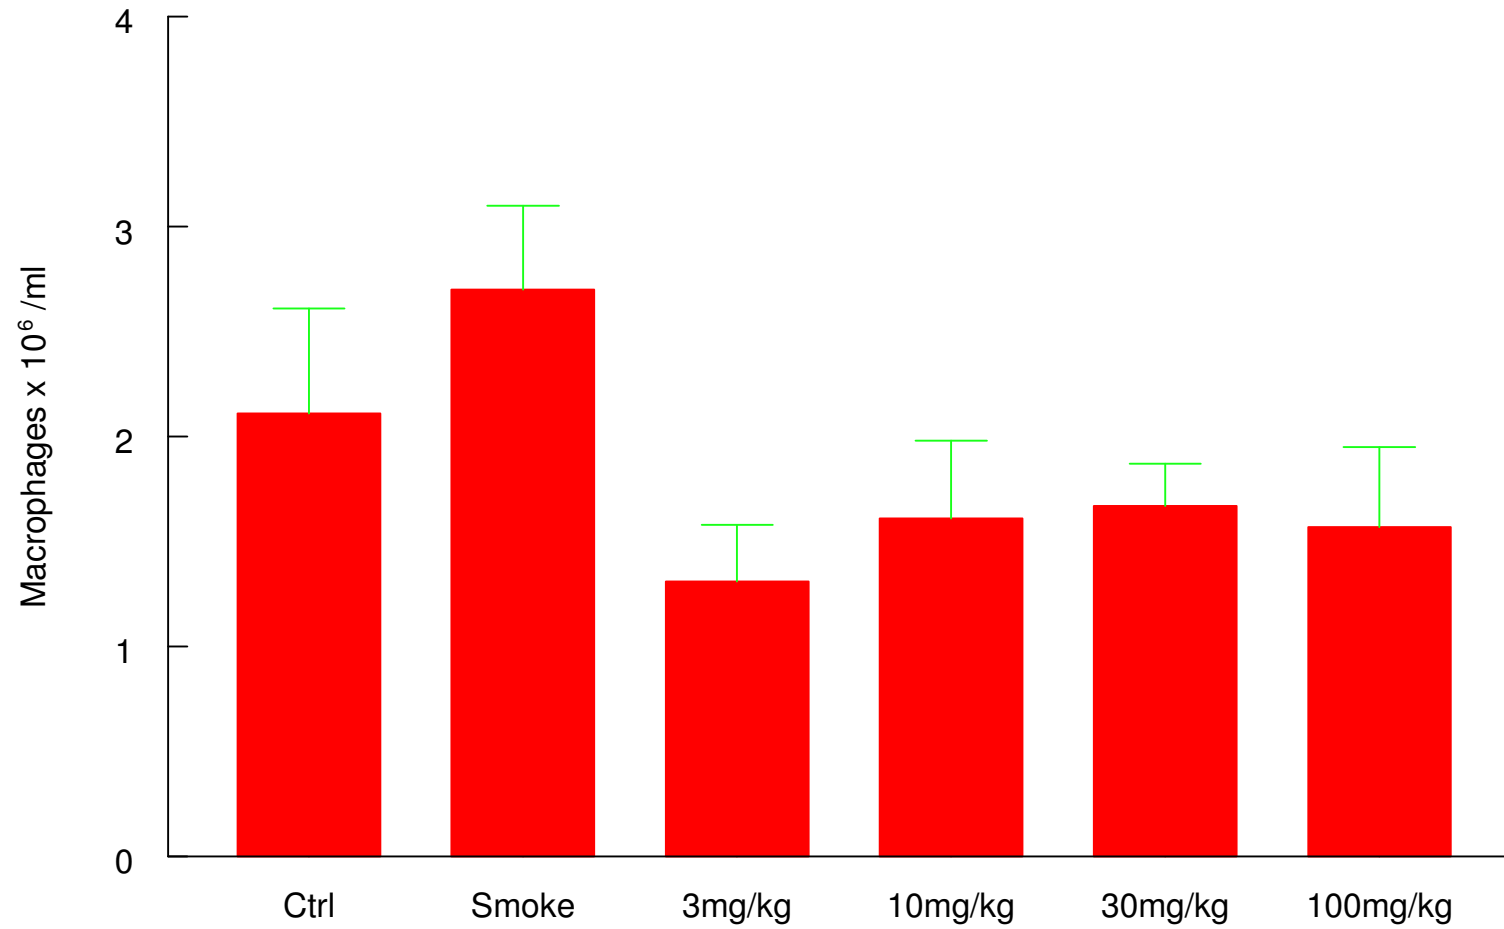

Supplement Figure 3

Supplement: thorax_thx.2006.068353_5.pdf [file thorax_thx.2006.068353_5.pdf]

## Pulmonary Function

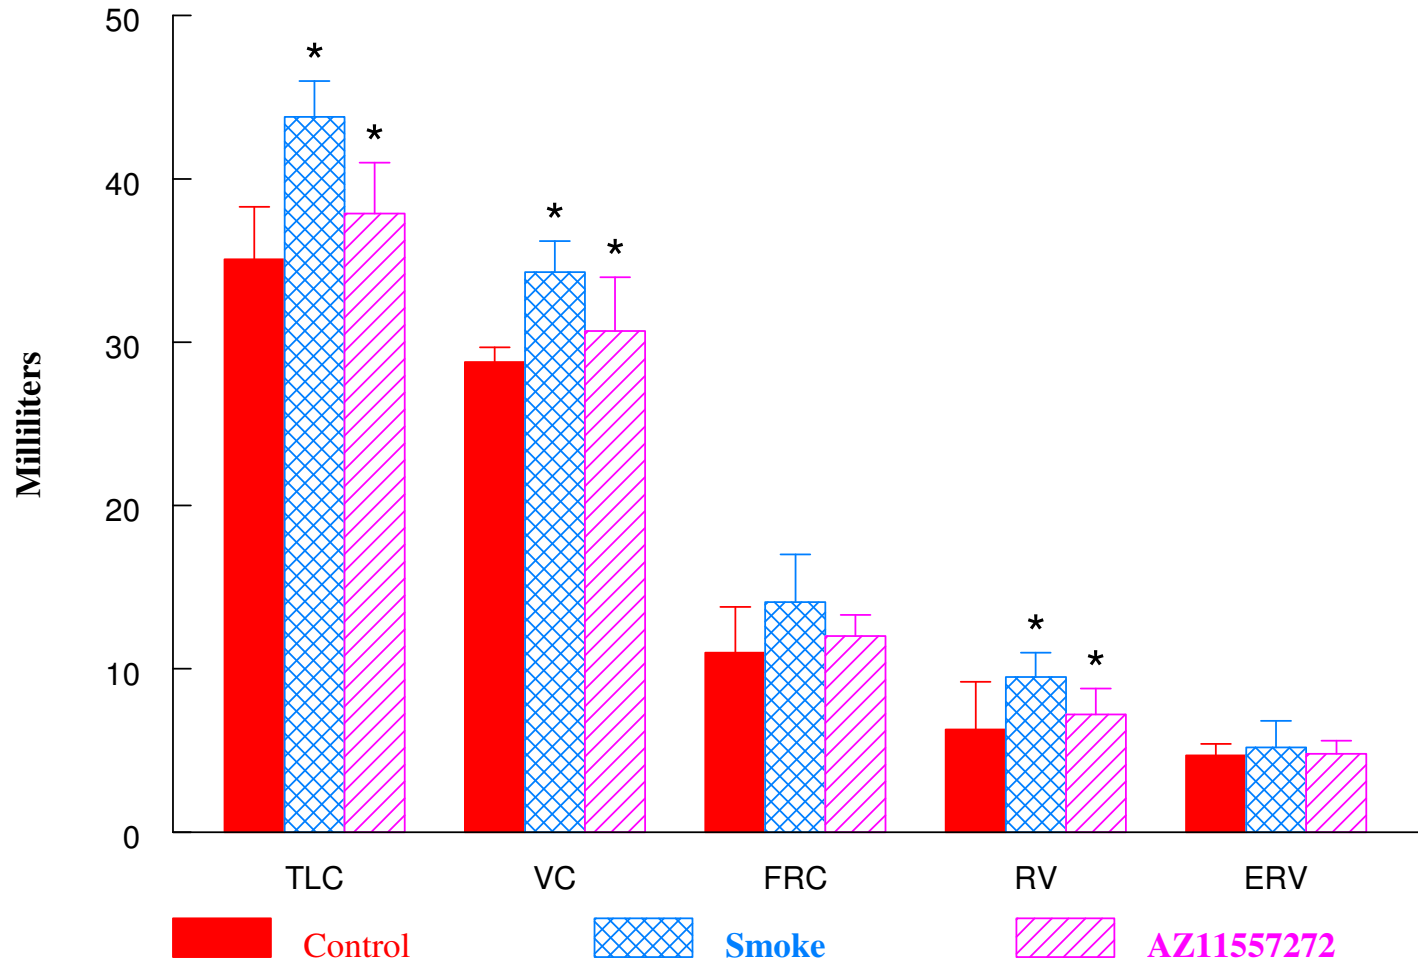

Supplement Figure 4

Supplement: thorax_thx.2006.068353_6.pdf [file thorax_thx.2006.068353_6.pdf]

Pulmonary Artery Pressure (PPa) - 6 Months

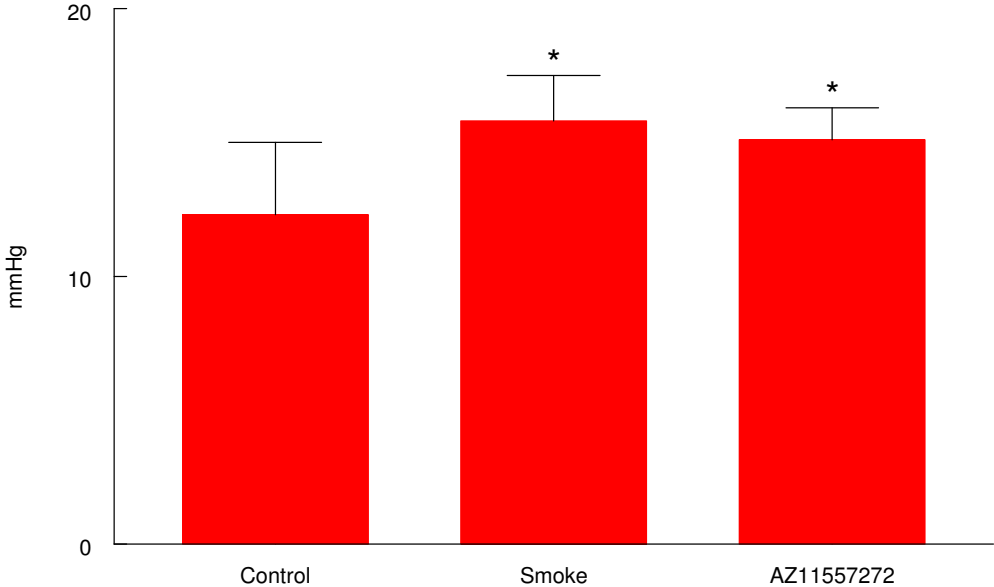

Supplement Figure 5

Supplement: thorax_thx.2006.068353_7.pdf [file thorax_thx.2006.068353_7.pdf]
